# Supplementary material
Source: publisher figshare collection journal article supplement (https://frontiersin.figshare.com/ndownloader/files/22052841)
Supplement: Supplementary file 1 [file 22052841]

Supplemental Table 4. Summary areas of the 1997-2010 LULC change according to more generalized change class groups drawn from the 25 most frequent LULC change classes.

| **LULC Change Class Group** | **Total Area (km2)** | **% Total Area** | **Original LULC Change Class #s (most to least frequent)** |
| --- | --- | --- | --- |
| No Change - Forest, Agriculture, Barren Areas | 295,906 | 65.55% | 77,33,66,44,11 |
| Change - In Forest Class1 | 58,360 | 12.93% | 76,75,65,67 |
| Change - Forest to Agriculture | 30,875 | 6.84% | 63,74,73,64,53 |
| Change - Conversion to Forest | 48,971 | 10.85% | 35,36,46,47,37,45,56 |
| Change - Agriculture to Urban | 1,653 | 0.37% | 32 |
| Change - Agriculture to IFP2 | 1,543 | 0.34% | 38 |
| Change - In Agriculture Class3 | 7,977 | 1.77% | 43,34 |
| Total - Top 25 Most Frequent Classes | 445,287 | 98.65% |  |
| Total - Rarest Classes (Non-Top 25) | 6,107 | 1.35% |  |
| Total - All 78 Mapped LULC Classes | 451,394 | 100.00% |  |

Forest Class1 = evergreen broadleaved forest, deciduous forest/scrub, or scrub/shrub/herbaceous areas (latter with forest regeneration)

IFP2 = Industrial Forest Plantation

Agriculture Class3 = permanent crops or actively cropped shifting cultivation areas
